# Supplementary material for: NAFLD and MAFLD as emerging causes of HCC: A populational study
Source: PubMed Central journal article supplement (PMC7957147; doi:10.1016/j.jhepr.2021.100231), 2021-01-19
Supplement: mmc1.pdf [file mmc1.pdf]

# **NAFLD and MAFLD as emerging causes of HCC: A populational study**

Shuna Myers, Isabelle Neyroud-Caspar, Laurent Spahr, Konstantinos Gkouvatsos, Evelyne Fournier, Emiliano Giostra, Giulia Magini, Jean-Louis Frossard, Marie-Eve Bascaron, Nathalie Vernaz, Lucia Zampaglione, Francesco Negro, Nicolas Goossens

## Table of contents

|               |    |
|---------------|----|
| Table S1..... | 2  |
| Table S2..... | 4  |
| Table S3..... | 5  |
| Table S4..... | 7  |
| Fig. S1.....  | 8  |
| Fig. S2.....  | 9  |
| Fig. S3.....  | 10 |
| Fig. S4.....  | 11 |

## Supplementary Tables

| Variable                        | Male sex, n=52    | Female sex, n=24  | p-value |
|---------------------------------|-------------------|-------------------|---------|
| <b>Clinical</b>                 |                   |                   |         |
| Age (y)                         | 75 (70-79)        | 75.5 (65.5-80.5)  | 0.960   |
| Diabetes (%)                    | 37/50 (74%)       | 17/24 (70.8%)     | 0.786   |
| Hypercholesterolemia (%)        | 23/48 (47.9%)     | 11/24 (45.8%)     | 1.000   |
| Weight (kg)                     | 86 (75.8-91.2)    | 70.5 (64-89.2)    | 0.025   |
| BMI (kg/m <sup>2</sup> )        | 29.8 (26.7-30.8)  | 28.1 (24.5-32.3)  | 0.404   |
| BMI ≥ 25kg/m <sup>2</sup> (%)   | 34/49 (69.4%)     | 14/24 (58.3%)     | 0.433   |
| <b>Biological</b>               |                   |                   |         |
| ALT (IU/L)                      | 36.5 (25-56.8)    | 35 (24.8-69.8)    | 0.976   |
| AST (IU/L)                      | 53 (38.8-82.8)    | 54 (33.8-126)     | 0.720   |
| Albumin (g/L)                   | 31 (27-34)        | 28 (26.8-32)      | 0.338   |
| Total bilirubin (μmol/L)        | 19 (14.8-32.8)    | 20 (11.2-24.8)    | 0.386   |
| Creatinine (μmol/L)             | 91 (78-124.5)     | 77.5 (63.8-97)    | 0.052   |
| Sodium (mmol/L)                 | 137.5 (135-139)   | 136.5 (133.8-140) | 0.733   |
| Platelets (10 <sup>9</sup> /L)  | 218 (139-296.8)   | 239.5 (149.2-354) | 0.624   |
| GGT (IU/L)                      | 197.5 (68.5-350)  | 126 (37.5-205)    | 0.052   |
| Alk Phos (IU/L)                 | 149 (84-194)      | 113 (80.5-213.5)  | 0.795   |
| Hemoglobin (g/L)                | 130 (116.5-148.5) | 113 (101.5-132.8) | 0.015   |
| INR                             | 1 (1-1)           | 1 (1-1)           | 0.365   |
| MELD                            | 11 (9-14)         | 9 (6-12)          | 0.018   |
| <b>Background liver</b>         |                   |                   |         |
| Histological F3-F4              | 20/36 (56%)       | 9/18 (50%)        | 0.777   |
| Histological or clinical F3-F4  | 29/45 (64%)       | 12/22 (55%)       | 0.594   |
| AFP (ng/mL)                     | 10.5 (3.8-331.2)  | 8.5 (4-760.8)     | 0.775   |
| Surveillance prior to diagnosis | 4/36 (11%)        | 1/20 (5%)         | 0.645   |
| <b>Cancer staging</b>           |                   |                   |         |
| T1                              | 7/46 (15%)        | 7/24 (29%)        | 0.300   |
| T2                              | 20/46 (43%)       | 6/24 (25%)        |         |
| T3                              | 17/46 (37%)       | 9/24 (38%)        |         |
| T4                              | 2/46 (4%)         | 2/24 (8%)         |         |
| N0                              | 29/33 (88%)       | 12/14 (86%)       | 1.000   |
| N1                              | 4/33 (12%)        | 2/14 (14%)        |         |
| N2                              | 0/33 (0%)         | 0/14 (0%)         |         |
| M0                              | 24/34 (71%)       | 12/16 (75%)       | 1.000   |
| M1                              | 10/34 (29%)       | 4/16 (25%)        |         |
| TNM stage                       |                   |                   | 0.602   |
| 1 (T1N0M0)                      | 5/34 (15%)        | 5/16 (31%)        |         |
| 2 (T2N0M0)                      | 10/34 (29%)       | 3/16 (19%)        |         |
| 3 (T3-4N0M0)                    | 9/34 (26%)        | 4/16 (25%)        |         |
| 4 (N1 or M1)                    | 10/34 (29%)       | 4/16 (25%)        |         |
| <b>Treatment</b>                |                   |                   |         |
| Liver transplantation           | 1/49 (2%)         | 1/24 (4%)         | 1.000   |
| Resection                       | 8/49 (16%)        | 7/24 (29%)        | 0.228   |

|                                   |             |            |       |
|-----------------------------------|-------------|------------|-------|
| Radiofrequency ablation           | 5/49 (10%)  | 5/24 (21%) | 0.281 |
| Chemoembolization                 | 23/49 (47%) | 9/24 (38%) | 0.466 |
| Systemic therapy                  | 6/49 (12%)  | 4/24 (7%)  | 0.720 |
| Best supportive care / no therapy | 14/49 (29%) | 6/24 (25%) | 1.000 |

**Table S1.** Comparison of clinical characteristics between female and male patients with NAFLD-HCC (n=76)

AFP, alpha fetoprotein; ALT, alanine transaminase; AST, aspartate aminotransferase; BMI, body mass index; GGT, gamma-glutamyl transferase; INR, international normalized ratio; LT, liver transplantation; MELD, Model for End Stage Liver Disease; RFA, radiofrequency ablation; TACE, transarterial chemoembolization

| Variable                                             | NAFLD (n=76)       | MAFLD, no NAFLD (n=377) | no MAFLD, no NAFLD, (n=467) | Overall p-value |
|------------------------------------------------------|--------------------|-------------------------|-----------------------------|-----------------|
| <b>Clinical</b>                                      |                    |                         |                             |                 |
| Age (y)                                              | 75 (70-80)         | 67 (60-74)              | 67 (58-77)                  | <0.001          |
| Female sex (%)                                       | 24/76 (31.6%)      | 54/377 (14.3%)          | 103/467 (22.1%)             | 0.001           |
| Diabetes (%)                                         | 54/74 (73%)        | 236/356 (66.3%)         | 1/242 (0.4%)                | <0.001          |
| Hypercholesterolemia (%)                             | 34/72 (47.2%)      | 81/318 (25.5%)          | 19/233 (8.2%)               | <0.001          |
| Weight (kg)                                          | 81 (69.8-91)       | 80 (72.3-90.6)          | 66.7 (57-74)                | <0.001          |
| BMI (kg/m <sup>2</sup> )                             | 28.7 (25.6-31)     | 27.4 (25.5-30)          | 21.4 (19.9-23.3)            | <0.001          |
| <b>Biological</b>                                    |                    |                         |                             |                 |
| ALT (IU/L)                                           | 36 (25-61)         | 48 (30-78.2)            | 51.5 (33-88)                | 0.007           |
| AST (IU/L)                                           | 53 (37.5-95.2)     | 74 (48-124)             | 89 (60-151.5)               | <0.001          |
| Albumin (g/L)                                        | 30 (27-34)         | 29 (25-34)              | 28 (23-32)                  | 0.011           |
| Total bilirubin (μmol/L)                             | 19 (14-31)         | 26 (17-46)              | 32 (18-62.8)                | <0.001          |
| Creatinine (μmol/L)                                  | 87.5 (73-117.8)    | 85 (70-112)             | 80 (65.5-100.5)             | 0.015           |
| Sodium (mmol/L)                                      | 137 (134.8-139)    | 136 (134-139)           | 137 (134-139)               | 0.105           |
| Platelets (10 <sup>9</sup> /L)                       | 224.5 (142.2-305)  | 144 (99.2-199.2)        | 129 (83-208)                | <0.001          |
| GGT (IU/L)                                           | 167 (62-295)       | 203 (110.8-362.2)       | 182.5 (101-357.2)           | 0.171           |
| Alk Phos (IU/L)                                      | 130.5 (82.8-196.8) | 123 (90-186)            | 133 (97-197)                | 0.205           |
| Hemoglobin (g/L)                                     | 126 (107-145.5)    | 128 (111.2-142)         | 127 (109-142)               | 0.753           |
| MELD                                                 | 10 (8-14)          | 12 (8-15.5)             | 12 (9-17)                   | 0.075           |
| Histological or clinical F3-F4                       | 41/67 (61.2%)      | 294/312 (94.2%)         | 264/286 (92.3%)             | <0.001          |
| <b>Tumor characteristics</b>                         |                    |                         |                             |                 |
| TNM stage 3 or 4                                     | 27/50 (54%)        | 130/205 (63.4%)         | 204/290 (70.3%)             | 0.046           |
| AFP (ng/mL)                                          | 9.5 (4-463)        | 21 (6-315.5)            | 40 (7-745)                  | 0.035           |
| <b>First line therapy</b>                            |                    |                         |                             |                 |
| Curative therapy (LT, Resection or RFA)              | 25/71 (35.2%)      | 91/340 (26.8%)          | 77/341 (22.6%)              | 0.070           |
| Palliative therapy (TACE, systemic therapy or other) | 26/71 (36.6%)      | 140/340 (41.1%)         | 109/341 (32.0%)             | 0.044           |
| Best supportive care / no therapy                    | 20/71 (28.2%)      | 109/340 (32.1%)         | 155/341 (45.4%)             | <0.001          |

**Table S2.** Clinical characteristics of NAFLD subjects (all were also MAFLD), MAFLD without NAFLD and subjects without NAFLD or MAFLD

| Variable                       | NAFLD (n=76)       | HCV, MAFLD (n=82)  | HCV, no MAFLD (n=109) | p-value | ALD, MAFLD (n=220) | ALD, no MAFLD (n=177) | p-value |
|--------------------------------|--------------------|--------------------|-----------------------|---------|--------------------|-----------------------|---------|
| <b>Clinical</b>                |                    |                    |                       |         |                    |                       |         |
| Age (y)                        | 75 (70-80)         | 62 (53-69)         | 59 (52-71)            | 0.871   | 68 (61.8-74)       | 67 (61-73)            | 0.380   |
| Female sex (%)                 | 24/76 (31.6%)      | 25/82 (30.5%)      | 35/109 (32.1%)        | 0.875   | 17/220 (7.7%)      | 18/177 (10.2%)        | 0.477   |
| Diabetes (%)                   | 54/74 (73%)        | 51/77 (66.2%)      | 0/71 (0%)             | <0.001  | 141/212 (66.5%)    | 0/99 (0%)             | <0.001  |
| Hypercholesterolemia (%)       | 34/72 (47.2%)      | 17/72 (23.6%)      | 5/68 (7.4%)           | 0.010   | 55/193 (28.5%)     | 6/95 (6.3%)           | <0.001  |
| Weight (kg)                    | 81 (69.8-91)       | 75.5 (66-85.8)     | 64.5 (55-71.2)        | <0.001  | 82 (75-91.9)       | 68.2 (61-77)          | <0.001  |
| BMI (kg/m <sup>2</sup> )       | 28.7 (25.6-31)     | 26.1 (24.8-28)     | 21.2 (19.9-23.2)      | <0.001  | 28.4 (25.9-30.7)   | 22.4 (20.3-23.4)      | <0.001  |
| <b>Biological</b>              |                    |                    |                       |         |                    |                       |         |
| ALT (IU/L)                     | 36 (25-61)         | 66 (41-113)        | 69 (43-113)           | 0.773   | 40 (28-62.5)       | 41 (28-63.8)          | 0.938   |
| AST (IU/L)                     | 53 (37.5-95.2)     | 95 (59.8-126.5)    | 102 (72.5-158.5)      | 0.010   | 68 (45-119.2)      | 81 (55-129)           | 0.037   |
| Albumin (g/L)                  | 30 (27-34)         | 29 (24-33)         | 28 (24.8-32)          | 0.800   | 28.5 (25-34)       | 26.5 (23-30.8)        | 0.003   |
| Total bilirubin (μmol/L)       | 19 (14-31)         | 24 (16-45)         | 24 (18-48)            | 0.439   | 27 (17-46.8)       | 41 (22-75)            | 0.002   |
| Creatinine (μmol/L)            | 87.5 (73-117.8)    | 75.5 (66-104)      | 73 (61-88.5)          | 0.257   | 85 (72-110)        | 83 (67-114)           | 0.667   |
| Sodium (mmol/L)                | 137 (134.8-139)    | 137 (134-139)      | 136 (135-139)         | 0.612   | 136 (133-139)      | 136 (133-139)         | 0.452   |
| Platelets (10 <sup>9</sup> /L) | 224.5 (142.2-305)  | 110.5 (79.2-173)   | 96 (69-137.8)         | 0.099   | 149 (111.8-197.8)  | 136.5 (87.8-205.2)    | 0.152   |
| GGT (IU/L)                     | 167 (62-295)       | 125.5 (74.2-253.2) | 142 (75.2-242.5)      | 0.664   | 264 (134.8-390.2)  | 209 (146.5-428)       | 0.660   |
| Alk Phos (IU/L)                | 130.5 (82.8-196.8) | 116 (86.5-164)     | 125 (94.5-153)        | 0.461   | 127 (94.5-189.5)   | 143 (105-212)         | 0.038   |
| Hemoglobin (g/L)               | 126 (107-145.5)    | 125 (113-139)      | 128 (114.8-143.2)     | 0.186   | 128 (109-142)      | 123 (104-138)         | 0.059   |
| MELD                           | 10 (8-14)          | 12 (8-15)          | 10 (8-16)             | 0.787   | 12 (8-16)          | 13 (10-18)            | 0.020   |
| Histological or clinical F3-F4 | 41/67 (61.2%)      | 72/75 (96%)        | 91/92 (98.9%)         | 0.327   | 174/185 (94.1%)    | 118/127 (92.9%)       | 0.815   |
| <b>Tumor characteristics</b>   |                    |                    |                       |         |                    |                       |         |
| TNM stage 3 or 4               | 27/50 (54%)        | 23/48 (47.9%)      | 42/75 (56%)           | 0.460   | 76/113 (67.3%)     | 75/107 (70.1%)        | 0.666   |
| AFP (ng/mL)                    | 9.5 (4-463)        | 24.5 (8-225.5)     | 42 (10-413.5)         | 0.436   | 15 (5-318)         | 28 (6-824)            | 0.152   |
| <b>First line HCC therapy</b>  |                    |                    |                       |         |                    |                       |         |

|                                                      |               |               |                |       |                |                |       |
|------------------------------------------------------|---------------|---------------|----------------|-------|----------------|----------------|-------|
| Curative therapy (LT, Resection or RFA)              | 25/71 (35.2%) | 31/78 (39.7%) | 30/100 (30.0%) | 0.204 | 43/202 (21.3%) | 22/141 (15.6%) | 0.209 |
| Palliative therapy (TACE, systemic therapy or other) | 26/71 (36.6%) | 34/78 (43.6%) | 40/100 (40.0%) | 0.649 | 84/202 (41.6%) | 43/141 (30.5%) | 0.041 |
| Best supportive care / no therapy                    | 20/71 (28.2%) | 13/78 (16.7%) | 30/100 (30%)   | 0.052 | 75/202 (37.1%) | 76/141 (53.9%) | 0.003 |

**Table S3.** Comparison of HCV and ALD subjects with and without MAFLD. P-values refer to comparisons between MAFLD vs no MAFLD across aetiology.

| <b>Variable</b>                                      | <b>NAFLD-HCC<br/>(definition 1), n=76</b> | <b>NAFLD (definition 2),<br/>n=101</b> |
|------------------------------------------------------|-------------------------------------------|----------------------------------------|
| <b>Clinical</b>                                      |                                           |                                        |
| Age (y)                                              | 75 (70-80)                                | 76 (71-82)                             |
| Female sex (%)                                       | 24/76 (31.6%)                             | 32/101 (31.7%)                         |
| Diabetes (%)                                         | 54/74 (73%)                               | 54/95 (56.8%)                          |
| Hypercholesterolemia (%)                             | 34/72 (47.2%)                             | 36/93 (38.7%)                          |
| Weight (kg)                                          | 81 (69.8-91)                              | 76 (66.7-90)                           |
| BMI (kg/m <sup>2</sup> )                             | 28.7 (25.6-31)                            | 28.5 (24.9-30.8)                       |
| BMI ≥ 25kg/m <sup>2</sup> (%)                        | 48/73 (65.8%)                             | 51/95 (53.7%)                          |
| <b>Biological</b>                                    |                                           |                                        |
| ALT (IU/L)                                           | 36 (25-61)                                | 36 (24.8-59.2)                         |
| AST (IU/L)                                           | 53 (37.5-95.2)                            | 54 (36-101.5)                          |
| Albumin (g/L)                                        | 30 (27-34)                                | 29 (27-34)                             |
| Total bilirubin (μmol/L)                             | 19 (14-31)                                | 20 (14-32)                             |
| Creatinine (μmol/L)                                  | 87.5 (73-117.8)                           | 86 (73-116.2)                          |
| Sodium (mmol/L)                                      | 137 (134.8-139)                           | 137.5 (135-140)                        |
| Platelets (10 <sup>9</sup> /L)                       | 224.5 (142.2-305)                         | 225 (141-294)                          |
| GGT (IU/L)                                           | 167 (62-295)                              | 167 (64-342)                           |
| Alk Phos (IU/L)                                      | 130.5 (82.8-196.8)                        | 147 (82.2-208)                         |
| Hemoglobin (g/L)                                     | 126 (107-145.5)                           | 126.5 (107.8-141.8)                    |
| INR                                                  | 1.19 (1.03-1.64)                          | 1.20 (1.00-1.50)                       |
| MELD                                                 | 10 (8-14)                                 | 10 (8-14)                              |
| <b>Background liver</b>                              |                                           |                                        |
| Histological F3-F4                                   | 29/54 (53.7%)                             | 30/60 (50%)                            |
| Histological or clinical F3-F4                       | 41/67 (61.2%)                             | 54/85 (64%)                            |
| AFP (ng/mL)                                          | 9.5 (4-463)                               | 12 (4-510.2)                           |
| Surveillance prior to diagnosis                      | 5/56 (9%)                                 | 5/63 (8%)                              |
| <b>Median survival (weeks)</b>                       | 101 (46-160)                              | 72 (39-122)                            |
| <b>Cancer TNM stage</b>                              |                                           |                                        |
| 1 (T1N0M0)                                           | 10/50 (20%)                               | 12/61 (20%)                            |
| 2 (T2N0M0)                                           | 13/50 (26%)                               | 16/61 (26%)                            |
| 3 (T3-4N0M0)                                         | 13/50 (26%)                               | 15/61 (25%)                            |
| 4 (N1 or M1)                                         | 14/50 (28%)                               | 18/61 (30%)                            |
| <b>Therapy</b>                                       |                                           |                                        |
| Curative therapy (LT, Resection or RFA)              | 25/73 (34%)                               | 26/93 (28%)                            |
| Palliative therapy (TACE, systemic therapy or other) | 44/73 (60%)                               | 49/93 (53%)                            |
| Best supportive care / no therapy                    | 20/73 (27%)                               | 34/93 (37%)                            |

**Table S4.** Comparison of different definitions of NAFLD-HCC. *Definition 1* corresponds to exclusion of other causes of liver disease and histological / clinical documentation of NAFLD or presence of metabolic syndrome / diabetes or obesity. *Definition 2* additionally includes patients with cryptogenic liver disease (see Methods for details).

## Supplementary Figures

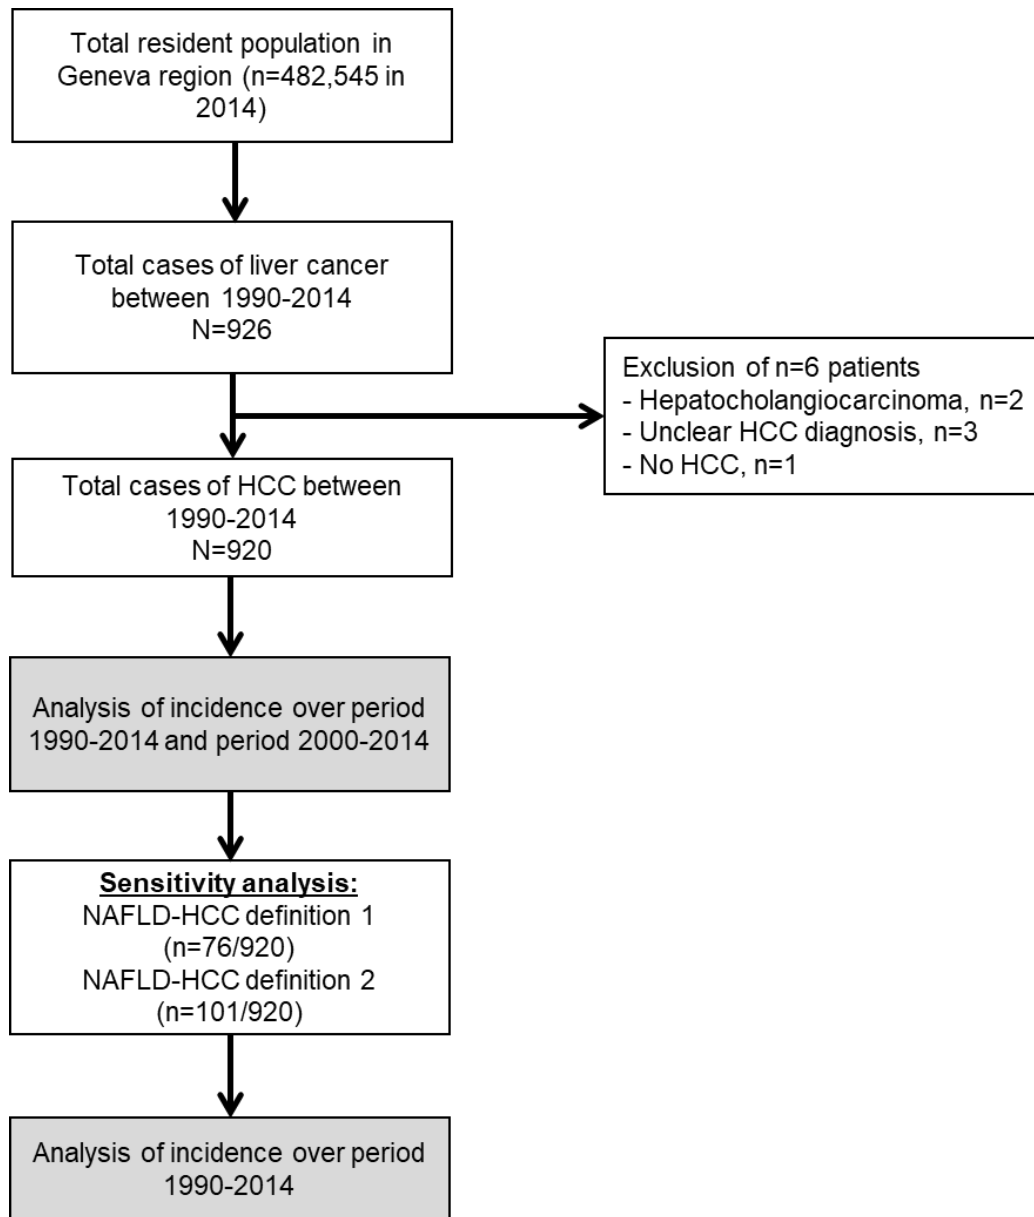

Fig. S1. Flowchart of the study population.



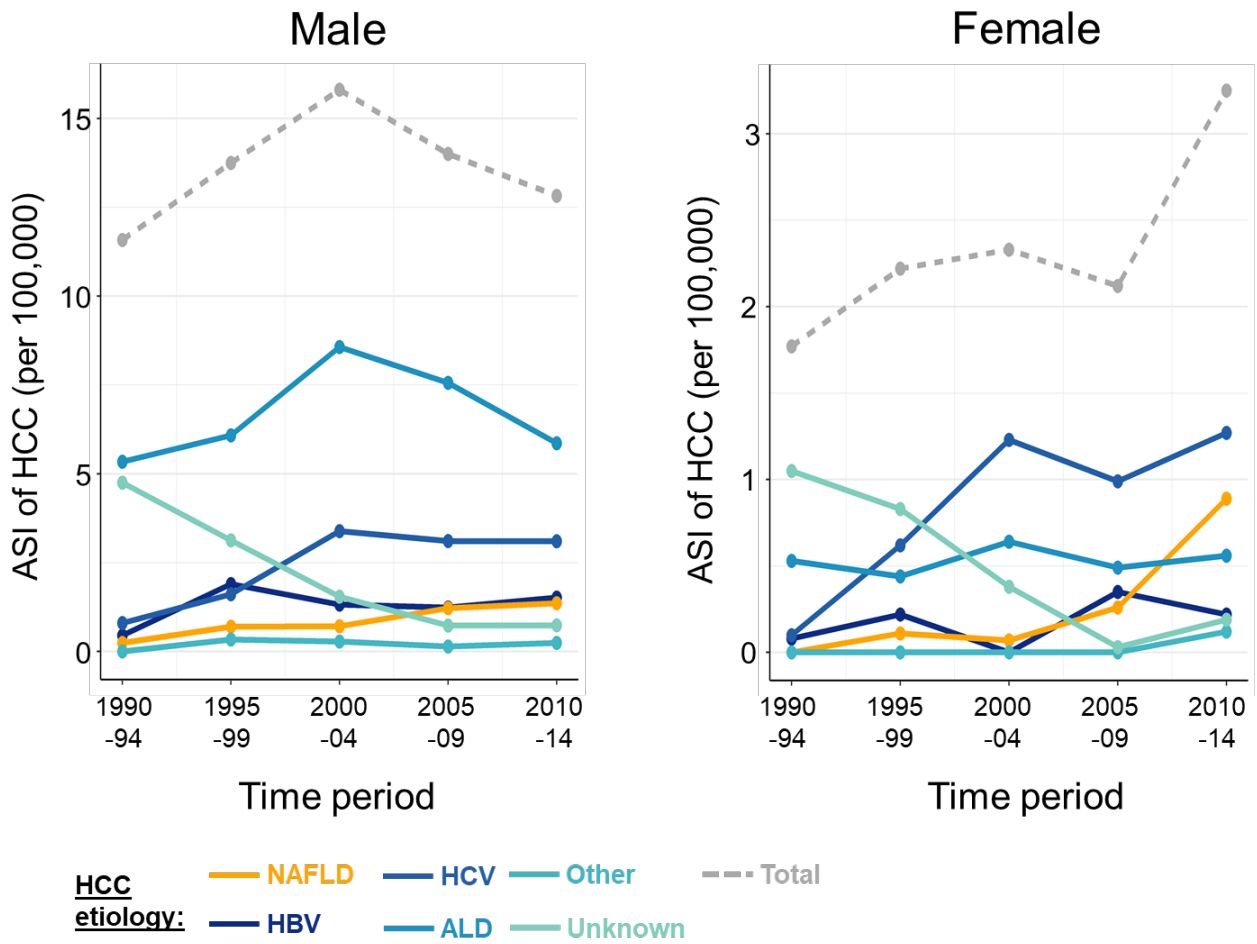

Fig. S2. Age-standardised incidence of HCC by etiology and according to male and female sex in the canton of Geneva in 5-year periods from 1990 to 2014.

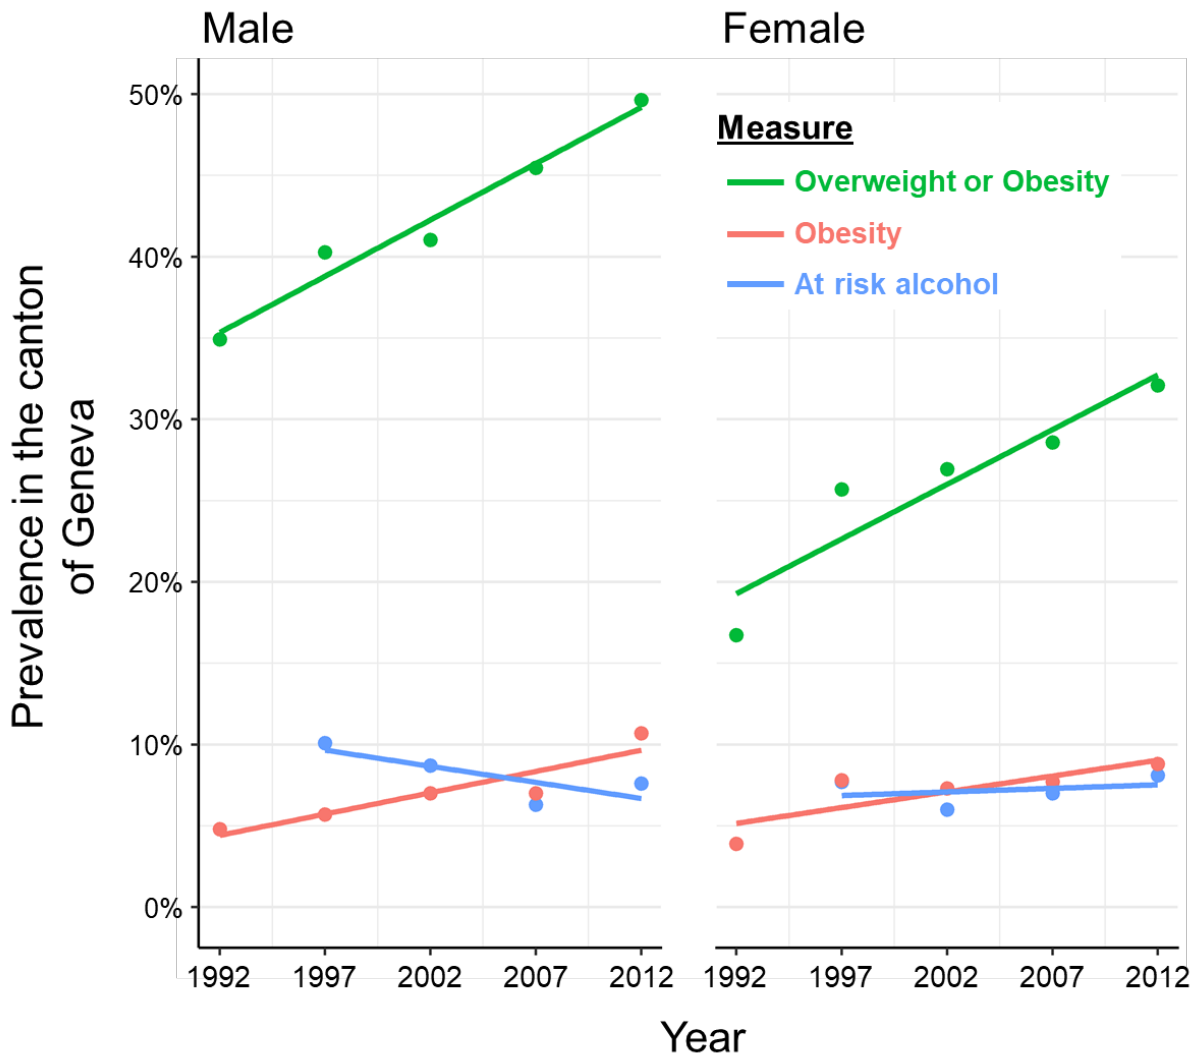

Fig. S3. Prevalence of overweight or obesity (body mass index [BMI]  $\geq 25$  kg/m<sup>2</sup>), obesity (BMI  $\geq 30$  kg/m<sup>2</sup>) and at risk alcohol consumption in the canton of Geneva from 1992 to 2012 in men and women. At risk alcohol consumption is defined as 4 standard units or more for men and 2 standard units or more for women a day.

Data from: Enquête suisse sur la santé 2017. Office fédéral de la statistique; 2018.  
<https://www.ge.ch/statistique/of/sante2017/files/fr/02.xml> accessed April 10th 2020.

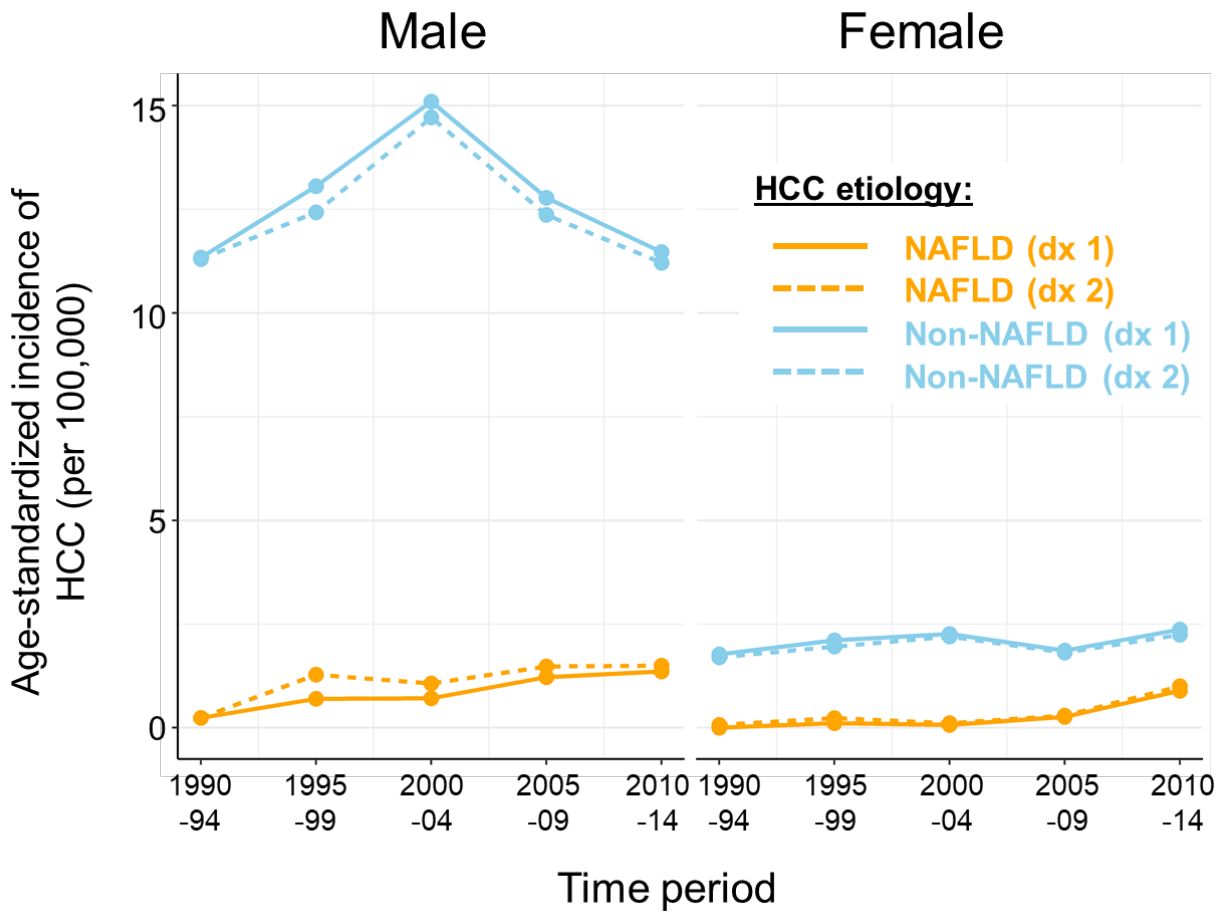

Fig. S4. Age-standardised incidence of HCC according to NAFLD-HCC diagnostic criteria. Definition 1 (dx 1) corresponds to exclusion of other causes of liver disease and histological / clinical documentation of NAFLD or presence of metabolic syndrome / diabetes or obesity. Definition 2 (dx 2) additionally includes patients with cryptogenic liver disease (see Methods for details).
